# Supplementary material for: The controllable and efficient synthesis of two-dimensional metal–organic framework nanosheets for heterogeneous catalysis
Source: Royal Society of Chemistry journal article supplement (doi:10.1039/d3nr05348b), 2023-12-06
Supplement: d3nr05348b1.pdf [file d3nr05348b1.pdf]

# Controllable and efficient synthesis of two-dimensional metal-organic framework nanosheets for heterogeneous catalysis

Ling-Xia Yun<sup>a,b</sup>, Cong Zhang<sup>a,b</sup>, Xin-Ran Shi<sup>a,b</sup>, Yan-Jun Dong<sup>a,b</sup>, Hang-Tian Zhang<sup>b,d,\*</sup>, Zhi-Gang Shen<sup>c</sup>, Jie-Xin Wang<sup>a,b,\*</sup>

*<sup>a</sup>State Key Laboratory of Organic-Inorganic Composites, Beijing University of Chemical Technology, Beijing 100029, PR China;*

*<sup>b</sup>Research Center of the Ministry of Education for High Gravity Engineering and Technology, Beijing University of Chemical Technology, Beijing, 100029, PR China;*

*<sup>c</sup>School of Chemical Engineering, Xiangtan University, Xiangtan, Hunan, 411105;*

*<sup>d</sup>Quzhou Innovation Institute for Chemical Engineering and Materials, Quzhou, Zhejiang, 324000*

Total number of pages: 8

Total number of Figures: 10 (Figure S1-S9)

Total number of Tables: 1 (Table S1)

---

Hang-Tian Zhang, E-mail: zhanghangtian\_zemon@outlook.com (H.T. Zhang)

Jie-Xin Wang, E-mail: wangjx@mail.buct.edu.cn (J.X. Wang)

## 1. Catalytic Knoevenagel condensation

The conversion of Knoevenagel condensation reaction of benzaldehyde with malononitrile using the ZIF-L catalyst is based on Equation S1 and calculated by Equation S2.<sup>1</sup>

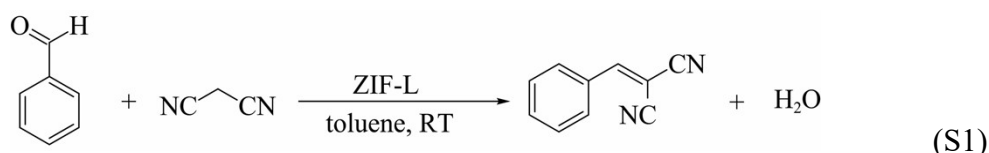

$$\text{Conversion of benzaldehyde} = \frac{n(\text{initial benzaldehyde}) - n(\text{residual benzaldehyde})}{n(\text{initial benzaldehyde})} \times 100\% \quad (\text{S2})$$

## 2. Catalytic glycolysis of PET

The conversion of glycolysis reaction of PET and the yield of monomer BHET are calculated by Equation S3 and S4, respectively.<sup>2</sup>

$$\text{Conversion of PET} = \frac{m(\text{initial PET}) - m(\text{residual PET})}{m(\text{initial PET})} \times 100\% \quad (\text{S3})$$

$$\text{Yield of BHET} = \frac{\text{conversion of PET}(\%) \times \text{selectivity of BHET}(\%)}{100\%} \quad (\text{S4})$$

The pseudo-first-order kinetics are calculated as follow (Equation S5-S7), where  $C_t$  and  $C_0$  refer to solid contents of PET at different times;  $X$  refers to PET conversion;  $k$  is the apparent rate constant;  $E_a$  refers to the apparent activation energy.  $A$ ,  $R$ , and  $T$  refer to the pre-exponential factor, gas constant ( $8.314 \text{ J}\cdot\text{k}^{-1}\cdot\text{mol}^{-1}$ ), and reaction temperature in Kelvin, respectively.<sup>3</sup>

$$\ln(C_t / C_0) = \ln(1 - X) \quad (\text{S5})$$

$$\ln(1 - X) = -kt \quad (\text{S6})$$

$$\ln k = -\frac{E_a}{RT} + \ln A \quad (\text{S7})$$

## 3. Preparation of 2D MOFs using RPB

High-gravity level (HGL) is represented by Equation S7, where  $\omega$  is the angular speed of the RPB,  $r$  is the geometric average radius of the packing, and  $g$  is the acceleration of gravity ( $10 \text{ m/s}^2$ ).<sup>4</sup>

$$HGL = \frac{\omega^2 r}{g} \quad (\text{S8})$$

**Table S1.** Comparison of several reported catalysts for Knoevenagel reaction.

| catalyst                    | reaction condition | catalyst amount | benzaldehyde conversion (%) | reference        |
|-----------------------------|--------------------|-----------------|-----------------------------|------------------|
| <b>ZIF-L-RPB nanosheets</b> | <b>25 °C, 2 h</b>  | <b>16 mg</b>    | <b>99.3</b>                 | <b>This work</b> |
| HP-ZIF-8                    | 25 °C, 3 h         | 20 mg           | 100                         | 1                |
| ZIF-67                      | 40 °C, 8h          | 25 mg           | 87                          | 5                |
| hydrotalcite                | 40 °C, 8 h         | 25 mg           | 75                          | 5                |
| ZIF-8                       | 30 °C, 6 h         | 100 mg          | 76.5                        | 6                |
| DES functionalized MIL-101  | 70 °C, 1 h         | 5 wt %          | 100                         | 7                |
| SOM-ZIF-8                   | 25 °C, 2 h         | 6.6 mg          | 100                         | 8                |

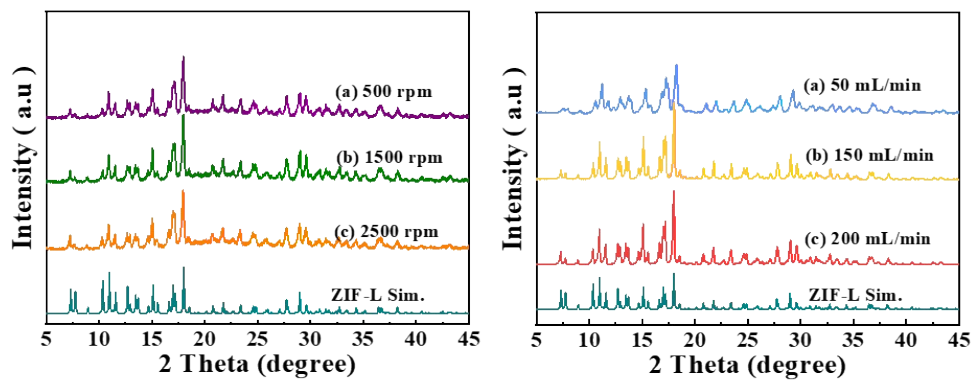

**Figure S1.** XRD patterns of ZIF-L nanosheets obtained at different (a) RPB rotating speeds and (b) feed rates.

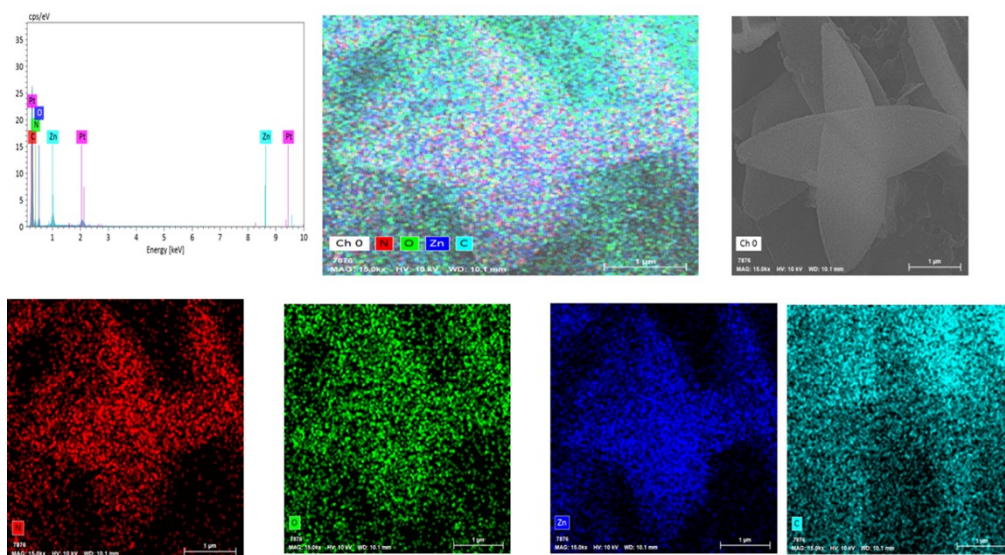

**Figure S2.** EDS images of ZIF-L-RPB nanosheets.

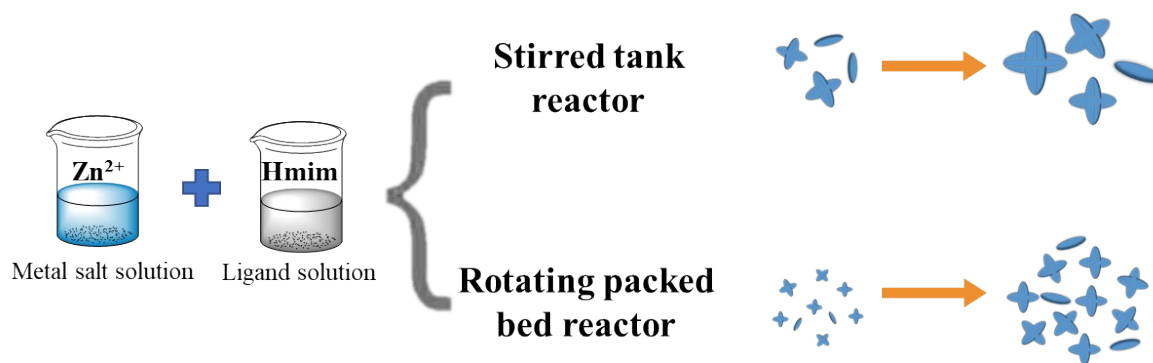

**Figure S3.** Illustration of the growth process of ZIF-L-STR and ZIF-L-RPB.

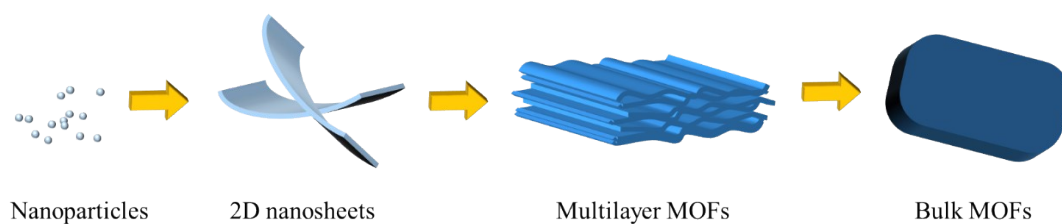

**Figure S4.** Growth process of 2D MOFs crystals.

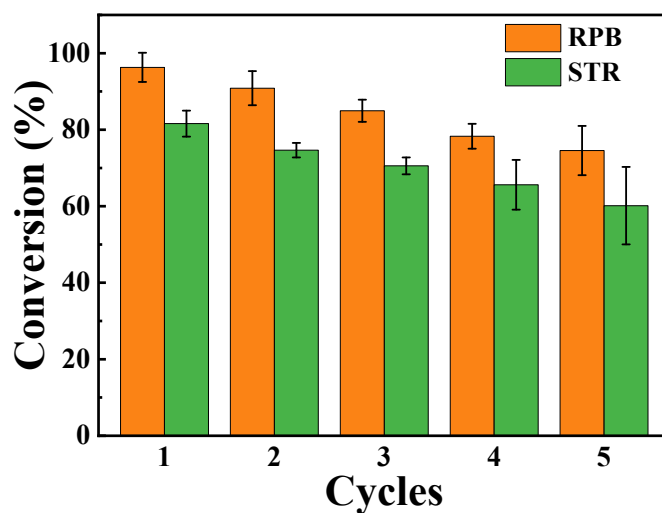

**Figure S5.** The reusability capacities of ZIF-L-STR and ZIF-L-RPB for the Knoevenagel condensation reaction. (the catalyst amount of 3.5 mol%, molar ratio of benzaldehyde to malononitrile of 1:1.9, 25 °C, 2 h)

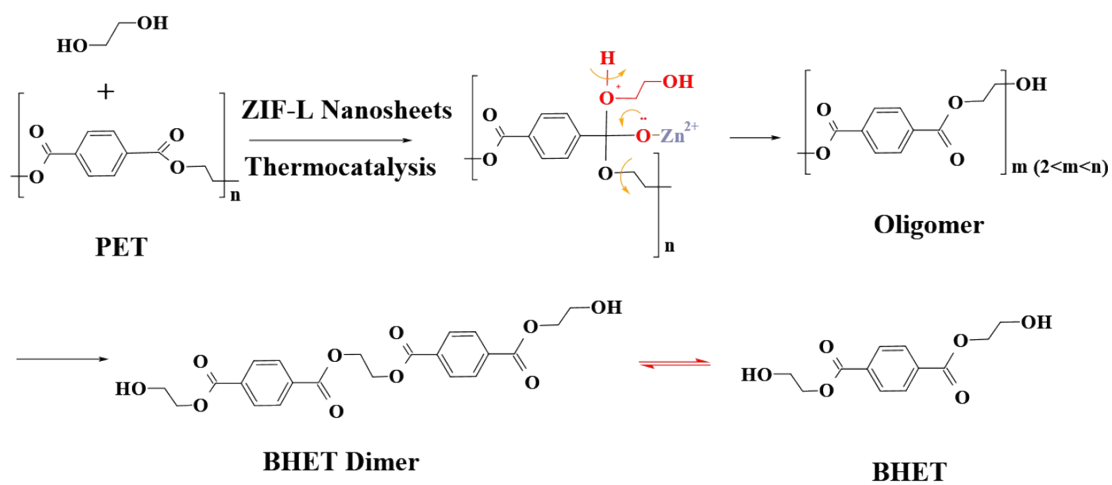

**Figure S6.** The schematic diagram of PET glycolysis over ZIF-L catalysts.

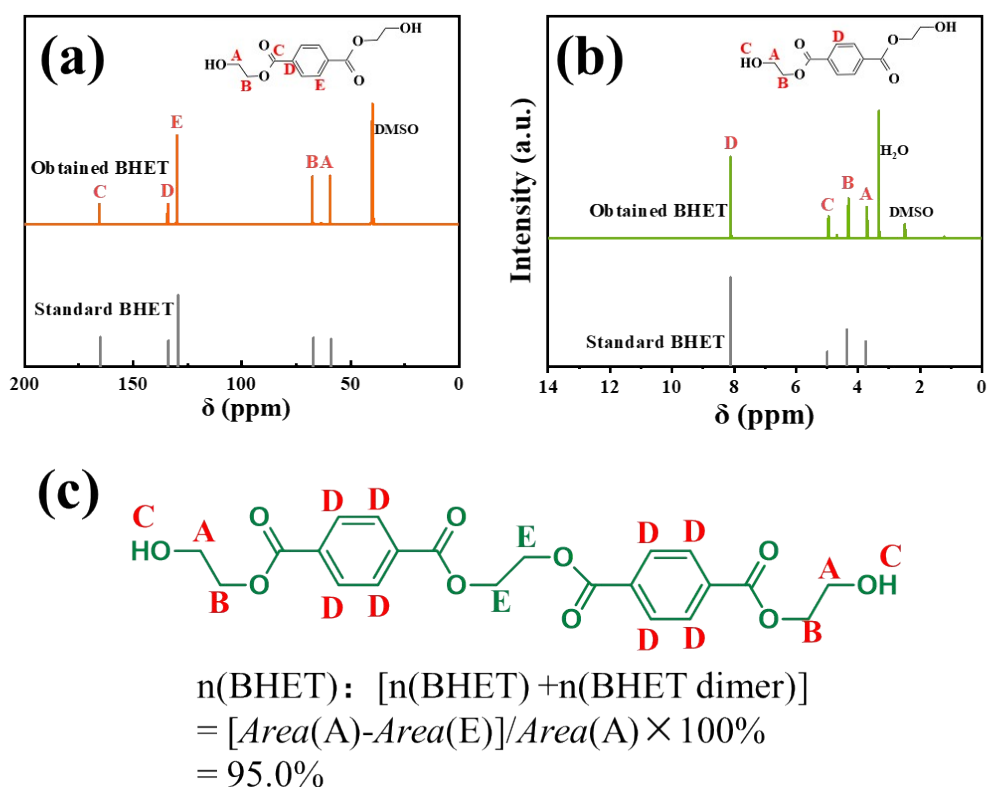

**Figure S7.** (a)  $^1\text{H}$  NMR and (b)  $^{13}\text{C}$  NMR spectra of the obtained BHET. (c) The ratio of BHET to BHET dimer in the product calculated by  $^1\text{H}$  NMR spectrum.

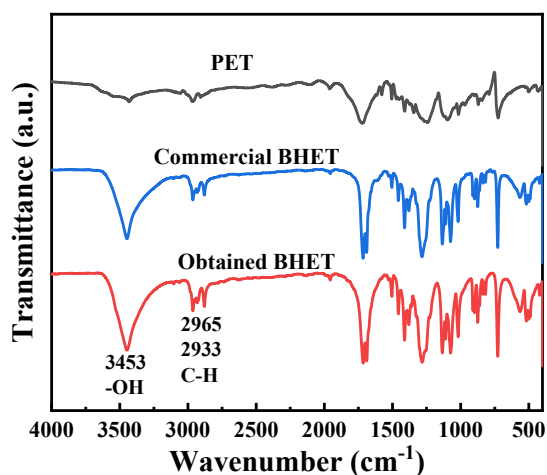

**Figure S8.** FTIR spectra of PET, commercial BHET, and BHET product obtained from the glycolysis reaction.

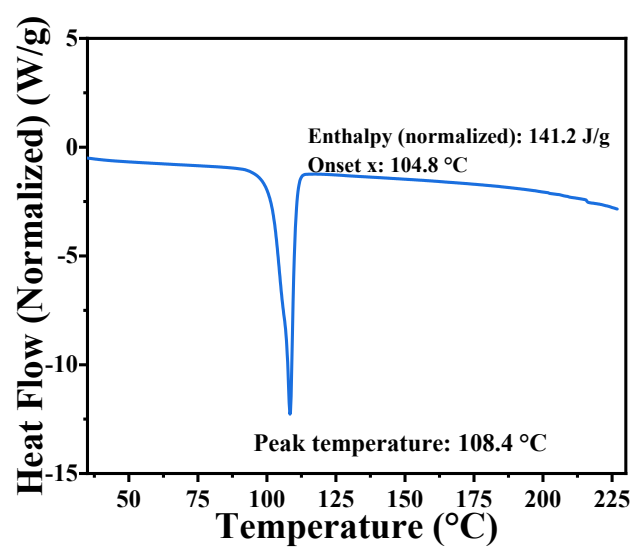

**Figure S9.** DSC curve of BHET produced from the glycolysis reaction.

## References

- 1 N. Wang, Y. Wei, M. Chang, J. Liu and J.-X. Wang, *ACS Appl. Mater. Inter.*, 2022, **14**, 10712-10720.
- 2 J.-T. Du, Q. Sun, X.-F. Zeng, D. Wang, J.-X. Wang and J.-F. Chen, *Chem. Eng. Sci.*, 2020, **220**, 115642.
- 3 Q. Suo, J. Zi, Z. Bai and S. Qi, *Catal. Lett.*, 2017, **147**, 240-252.
- 4 H. Zhao, L. Shao and J.-F. Chen, *Chem. Eng. J.*, 2009, **156**, 588-593.
- 5 S. F. Amarante, M. A. Freire, D. T. Mendes, L. S. Freitas and A. L. Ramos, *Appl. Catal. A Gen.*, 2017, **548**, 47-51.
- 6 P. D. Du, N. V. Duy Thanh and N. T. Hieu, *Adv. Mater. Sci. Eng.*, 2019, 1-8.
- 7 G. Anılır, E. Sert, E. Yılmaz and F. S. Atalay, *J. Solid State Chem.*, 2020, **283**, 121138.
- 8 K. Shen, L. Zhang, X. Chen, L. Liu, D. Zhang, Y. Han, J. Chen, J. Long, R. Luque, Y. Li and B. Chen, *Science*, 2018, **359**, 206-210.
